# Supplementary material for: Alpha‐momorcharin enhances Nicotiana benthamiana resistance to tobacco mosaic virus infection through modulation of reactive oxygen species
Source: PubMed Central journal article supplement — Mol Plant Pathol. 2020 Jul 26;21(9):1212–26. doi: 10.1111/mpp.12974 (PMC7411664; doi:10.1111/mpp.12974), 2020-07-26
Supplement: MPP-21-1212-s001.pdf [file MPP-21-1212-s001.pdf]

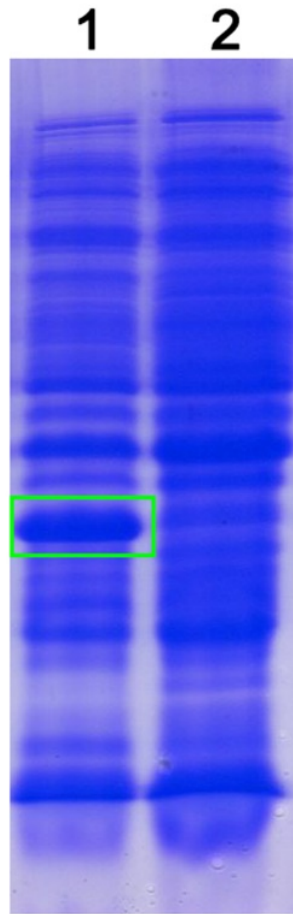

**FIGURE S1** A soluble recombinant His-tagged  $\alpha$ -MMC protein was induced in *E. coli* by prokaryotic expression system. 1: 37°C, IPTG (1 mmol/L) induction; 2: 37°C, uninduced by IPTG
