# Supplementary material for: Alpha‐momorcharin enhances Nicotiana benthamiana resistance to tobacco mosaic virus infection through modulation of reactive oxygen species
Source: PubMed Central journal article supplement — Mol Plant Pathol. 2020 Jul 26;21(9):1212–26. doi: 10.1111/mpp.12974 (PMC7411664; doi:10.1111/mpp.12974), 2020-07-26
Supplement: MPP-21-1212-s002.pdf [file MPP-21-1212-s002.pdf]

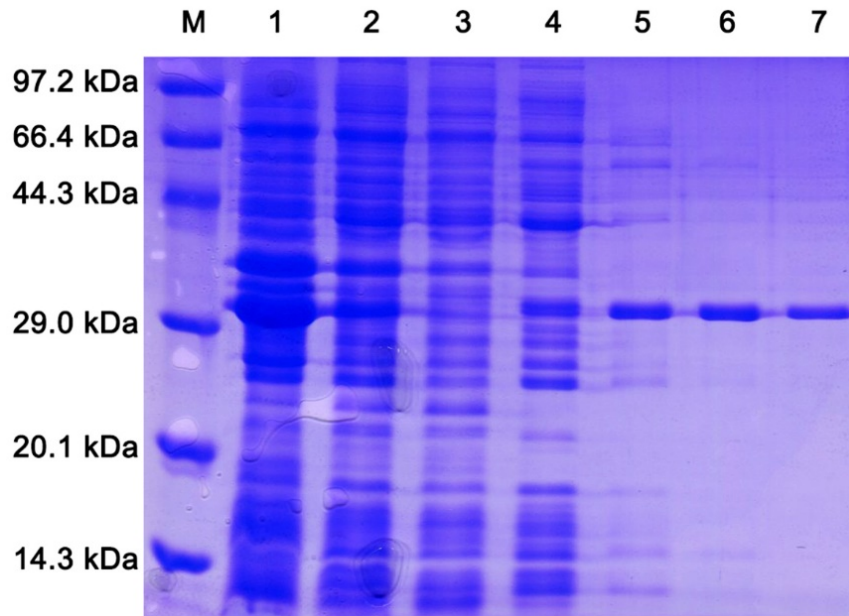

**FIGURE S2**  $\alpha$ -MMC fusion proteins were purified by Ni-NTA Resin affinity chromatography. M: Protein Marker; 1: Precipitation; 2: Supernatant; 3: Penetrant solution; 4: 60 mmol/L imidazole eluate; 5: 80 mmol/L imidazole eluate; 6: 100 mmol/L imidazole eluate; 7: 200 mmol/L imidazole eluate
