# Supplementary material for: Alpha‐momorcharin enhances Nicotiana benthamiana resistance to tobacco mosaic virus infection through modulation of reactive oxygen species
Source: PubMed Central journal article supplement — Mol Plant Pathol. 2020 Jul 26;21(9):1212–26. doi: 10.1111/mpp.12974 (PMC7411664; doi:10.1111/mpp.12974), 2020-07-26
Supplement: MPP-21-1212-s003.pdf [file MPP-21-1212-s003.pdf]

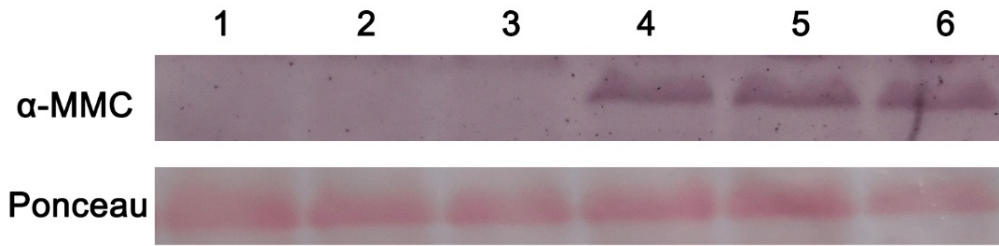

**FIGURE S3** Western blotting analysis of the expression of  $\alpha$ -MMC in bitter melon seeds using anti- $\alpha$ -MMC polyclonal antibody obtained from our self preparation. Rubisco proteins were used as loading controls and were stained by Ponceau S. 1, 2, 3: Total protein of wild-type *N. benthamiana* plants; 4, 5, 6: Total protein of bitter melon seeds
