# Supplementary material for: Alpha‐momorcharin enhances Nicotiana benthamiana resistance to tobacco mosaic virus infection through modulation of reactive oxygen species
Source: PubMed Central journal article supplement — Mol Plant Pathol. 2020 Jul 26;21(9):1212–26. doi: 10.1111/mpp.12974 (PMC7411664; doi:10.1111/mpp.12974), 2020-07-26
Supplement: MPP-21-1212-s004.pdf [file MPP-21-1212-s004.pdf]

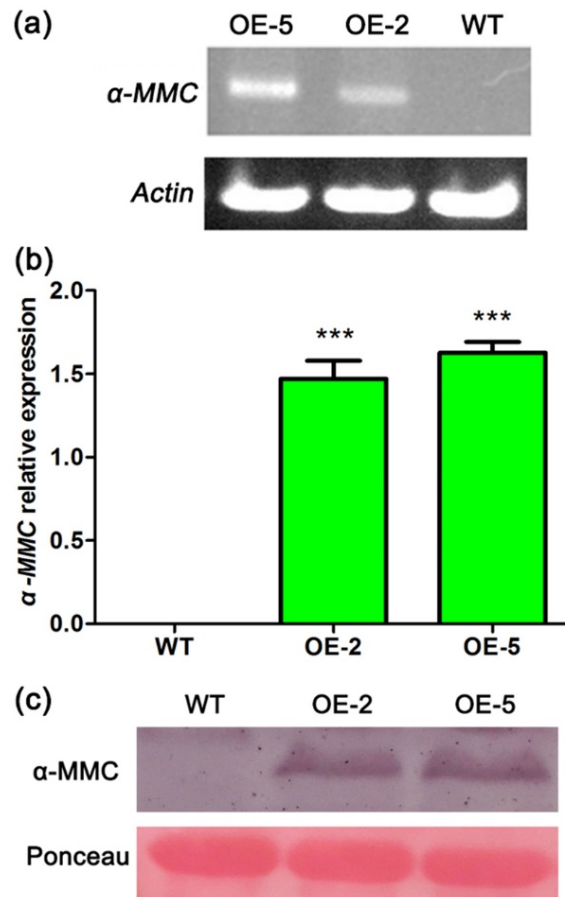

**FIGURE S4** Molecular analyses of  $\alpha$ -MMC transgenic *N. benthamiana* plants. (a) Semiquantitative RT-PCR analysis of  $\alpha$ -MMC expression in leaves of WT and transgenic lines OE-2 and OE-5. (b) Quantitative RT-PCR analysis of  $\alpha$ -MMC expression in leaves of WT and transgenic lines OE-2 and OE-5. Bars represent mean and standard deviation of values obtained from three biological replicates. Asterisks represent significant difference determined by Student's t test (\*\*\*)  $P < 0.001$ . (c) Western blotting analysis of  $\alpha$ -MMC expression in leaves of WT and transgenic lines OE-2 and OE-5. Rubisco proteins were used as loading controls and were stained by Ponceau S. WT: nontransformed wild type *N. benthamiana* plants. OE-2 and OE-5:  $\alpha$ -MMC -transgenic *N. benthamiana* lines
