# Supplementary material for: Alpha‐momorcharin enhances Nicotiana benthamiana resistance to tobacco mosaic virus infection through modulation of reactive oxygen species
Source: PubMed Central journal article supplement — Mol Plant Pathol. 2020 Jul 26;21(9):1212–26. doi: 10.1111/mpp.12974 (PMC7411664; doi:10.1111/mpp.12974), 2020-07-26
Supplement: MPP-21-1212-s005.pdf [file MPP-21-1212-s005.pdf]

**Table S1** Primer sequences used for semiquantitative RT-PCR and quantitative real-time PCR analysis of gene expression

| <b>Gene</b>         | <b>F primer (5'→3')</b>   | <b>R primer (5'→3')</b> |
|---------------------|---------------------------|-------------------------|
| <i>NbCAT1</i>       | AGCCAAATCCTAAGTCCC        | CCAGCAGCAATAGAGTCAT     |
| <i>NbCAT2</i>       | CGGAGGAGCAAATCACAG        | CCACAATAGAAGGGCAGA      |
| <i>NbCAT3</i>       | ATCATAGTCACGCCACC         | CTTGTCATCCGAATAGTAAA    |
| <i>NbFeSOD</i>      | CCTATGGATGCTTTGGGG        | TGGTGAGGAGCGGTGTGT      |
| <i>NbMnSOD</i>      | AGACCTTTTCGCTCCCCG        | CCACACCAAGCCACACCC      |
| <i>NbMCu/Zn-SOD</i> | ATTTTTGGTGTTGTTTCGC       | AGTTTGTTGGTTGCTTCC      |
| <i>NbAPX1</i>       | GTGCTCCTATTATGCTCCGTCCT   | GGTGGCTCTGGCTTGTCTT     |
| <i>NbAPX2</i>       | TGGAGCCATTAGGGAGCAGT      | GCCAGGGTGAAAGGGAACATC   |
| <i>NbAPX3</i>       | TACTTCGGTTTCAGATGGC       | TCAGCGTAGGATAGGATTGG    |
| <i>NbAPX4</i>       | GGTTTACCCCAAGTTCTG        | CTTCATCCTTTTCCGCAC      |
| <i>NbAPX5</i>       | GAGAGCATTTAGGAGAGG        | TCAGCAGACAAGGACCAG      |
| <i>NbAPX6</i>       | TCCTATTTGGTTTCGCTT        | CTGGTCCATCTTTCGTGT      |
| <i>NbAPX7</i>       | CAGTTGAAAAGTGCGAGA        | AATGAGCAGCAGGGGAAG      |
| <i>α-MMC</i>        | GGGGCACTGCTTGTA           | CGTTGTCACCCTCTG         |
| <i>TMV-MP</i>       | GACCTGACAAAAATGGAGAAGATCT | GAAAGCGGACAGAAACCCGCTG  |
| <i>NbActin</i>      | AACTGATGAAGATACTCACA      | CAGGATACGGGGAGCTAAT     |
